# Supplementary material for: Impact of Geographic Location on Diagnosis and Initial Management of Takayasu Arteritis: A Tale of Two Cohorts from Italy and India
Source: MDPI journal article supplement (doi:10.3390/diagnostics12123102), 2022-12-09
Supplement: s1 [file s1]

**Supplementary Table S1: Clinical features at presentation<sup>s</sup>**

|                                                 | Italy<br>(n=127)                                                                                                                                                                              | India<br>(n=191)                                                                                                                                                        | Odd's<br>ratio<br>(95% CI)<br>(Italy vs<br>India) | p value*<br>corrected<br>for<br>multiple<br>testing |
|-------------------------------------------------|-----------------------------------------------------------------------------------------------------------------------------------------------------------------------------------------------|-------------------------------------------------------------------------------------------------------------------------------------------------------------------------|---------------------------------------------------|-----------------------------------------------------|
| <b>Clinical features at presentation [n(%)]</b> |                                                                                                                                                                                               |                                                                                                                                                                         |                                                   |                                                     |
| None                                            | 4 (3)                                                                                                                                                                                         | 0 (0)                                                                                                                                                                   | -                                                 | 0.451 <sup>b</sup>                                  |
| Seizure                                         | 0 (0)                                                                                                                                                                                         | 9 (5)                                                                                                                                                                   | -                                                 | 0.266 <sup>b</sup>                                  |
| Documented<br>TAK<br>retinopathy                | 0 (0)                                                                                                                                                                                         | 2 (1)                                                                                                                                                                   | -                                                 | >0.999 <sup>b</sup>                                 |
| Aortic<br>regurgitation                         | 0 (0)                                                                                                                                                                                         | 11 (6)                                                                                                                                                                  | -                                                 | 0.090 <sup>b</sup>                                  |
| Acute coronary<br>syndrome                      | 7 (5)                                                                                                                                                                                         | 0 (0)                                                                                                                                                                   | -                                                 | <b>0.035<sup>b</sup></b>                            |
| Other                                           | 17 (13)                                                                                                                                                                                       | 22 (12)                                                                                                                                                                 | -                                                 | -                                                   |
| Specify list with<br>numbers                    | Dyspnoea (n=9)<br>Flank pain (n=1)<br>Cardiac arrest<br>(n=1)<br>Myocarditis (n=1)<br>Lung infarction<br>(n=2)<br>Pulmonary<br>arterial<br>hypertension<br>(n=1)<br>Digital necrosis<br>(n=1) | Palpitations<br>(n=8)<br>Digital necrosis<br>(n=1)<br>Hemoptysis<br>(n=2)<br>Breathlessness<br>(n=9)<br>Oral ulcers (n=1)<br>Occasional<br>upper limb<br>numbness (n=1) |                                                   |                                                     |
| <b>Baseline investigations</b>                  |                                                                                                                                                                                               |                                                                                                                                                                         |                                                   |                                                     |
| ESR (mm/hr)<br>[mean (± SD)]                    | 61 ± 32                                                                                                                                                                                       | 46 ± 32 (n=186)                                                                                                                                                         | -                                                 | <b>&lt;0.001</b>                                    |
| CRP (mg/L)<br>[mean (± SD)]                     | 37 ± 42                                                                                                                                                                                       | 24 ± 32 (n=179)                                                                                                                                                         | -                                                 | <b>0.007</b>                                        |
| Hemoglobin<br>(g/dL)<br>[mean (± SD)]           | 11.8 ± 1.2                                                                                                                                                                                    | 11.4 ± 2.0<br>(n=185)                                                                                                                                                   | -                                                 | 0.128                                               |

---

<sup>\$</sup>Those clinical features other than the ones depicted in Figure 1 are presented here.

\* Chi squared<sup>a</sup>/ Fisher's exact<sup>b</sup> for proportions

BP – Blood pressure; 95% CI – 95% confidence interval; CRP – C-reactive protein; ESR – Erythrocyte sedimentation rate; SD – Standard deviation; TAK – Takayasu arteritis; TIA – Transient ischemic attack.

NA – Not assessable

p values <0.05 are highlighted in bold

---

**Supplementary Table S2: Imaging modalities and vascular involvement at initial assessment**

|                                           | <b>Italy<br/>[n(%)]</b> | <b>India<br/>[n(%)]</b> | <b>Odd's ratio<br/>(95% CI)<br/>(Italy vs<br/>India)</b> | <b>p value<br/>corrected<br/>for<br/>multiple<br/>testing</b> |
|-------------------------------------------|-------------------------|-------------------------|----------------------------------------------------------|---------------------------------------------------------------|
| <b>Imaging<br/>modalities<sup>s</sup></b> | (n=127)                 | (n=191)                 |                                                          |                                                               |
| PET-MRI                                   | 1 (0.8)                 | 0 (0)                   | -                                                        | 0.953 <sup>b</sup>                                            |
| <b>Vascular<br/>involvement</b>           | n=127                   | n=190                   |                                                          |                                                               |
| Coronary                                  | 15 (12)                 | 3 (2)                   | 8.35 (2.49 – 27.52)                                      | <b>0.005<sup>b</sup></b>                                      |
| Right subclavian                          | 65 (51)                 | 75 (39)                 | 1.61 (1.02 – 2.55)                                       | 0.590 <sup>a</sup>                                            |
| Left subclavian                           | 81 (64)                 | 138 (73)                | 0.66 (0.41 – 1.08)                                       | 0.888 <sup>a</sup>                                            |
| Right carotid                             | 74 (58)                 | 75 (39)                 | 2.14 (1.36 – 3.34)                                       | <b>0.022<sup>a</sup></b>                                      |
| Left carotid                              | 79 (62)                 | 99 (52)                 | 1.51 (0.96 – 2.36)                                       | 0.823 <sup>a</sup>                                            |
| Right vertebral                           | 22 (17)                 | 6 (3)                   | 6.43 (2.52 – 15.55)                                      | <b>&lt;0.001<sup>a</sup></b>                                  |
| Left vertebral                            | 18 (14)                 | 22 (12)                 | 1.26 (0.64 – 2.38)                                       | >0.999 <sup>a</sup>                                           |
| Pulmonary                                 | 21 (17)                 | 11 (6)                  | 3.22 (1.46 – 7.21)                                       | <b>0.040<sup>a</sup></b>                                      |
| Brachiocephalic                           | 34 (27)                 | 48 (25)                 | 1.08 (0.64 – 1.79)                                       | >0.999 <sup>a</sup>                                           |
| Ascending aorta                           | 36 (28)                 | 36 (19)                 | 1.69 (1.01 – 2.84)                                       | 0.679 <sup>a</sup>                                            |
| Arch of aorta                             | 44 (35)                 | 67 (35)                 | 0.97 (0.61 – 1.54)                                       | >0.999 <sup>a</sup>                                           |
| Descending thoracic aorta                 | 45 (35)                 | 94 (49)                 | 0.56 (0.36 – 0.89)                                       | 0.259 <sup>a</sup>                                            |
| Abdominal aorta                           | 57 (45)                 | 105 (55)                | 0.66 (0.42 – 1.03)                                       | 0.797 <sup>a</sup>                                            |
| Celiac trunk                              | 38 (30)                 | 49 (26)                 | 1.23 (0.75 – 1.99)                                       | >0.999 <sup>a</sup>                                           |
| Superior mesenteric artery                | 36 (28)                 | 44 (23)                 | 1.31 (0.78 – 2.19)                                       | >0.999 <sup>a</sup>                                           |

|                            |         |         |                     |                          |
|----------------------------|---------|---------|---------------------|--------------------------|
| Inferior mesenteric artery | 4 (3)   | 8 (4)   | 0.74 (0.24 – 2.40)  | >0.999 <sup>b</sup>      |
| Right renal                | 27 (21) | 81 (43) | 0.36 (0.22 – 0.61)  | <b>0.002<sup>a</sup></b> |
| Left renal                 | 25 (20) | 78 (41) | 0.35 (0.21 – 0.60)  | <b>0.002<sup>a</sup></b> |
| Right iliac                | 21 (16) | 12 (6)  | 2.94 (1.37 – 6.15)  | 0.074 <sup>a</sup>       |
| Left iliac                 | 21 (16) | 13 (7)  | 2.70 (1.29 – 5.37)  | 0.129 <sup>a</sup>       |
| Right femoral              | 4 (3)   | 2 (1)   | 3.06 (0.70 – 16.21) | 0.996 <sup>b</sup>       |
| Left femoral               | 2 (2)   | 3 (2)   | 0.99 (0.18 – 4.94)  | >0.999 <sup>b</sup>      |

<sup>a</sup>Those imaging modalities other than the ones depicted in Figure 2A are presented here.

\* Chi squared<sup>a</sup>/ Fisher's exact<sup>b</sup> for proportions

95% CI – 95% confidence interval; C+ - Coronary involvement; CT –

Computerized tomography; PET – Positron emission tomography; MRI –

Magnetic resonance imaging; NA – Not assessable; P+ - Pulmonary involvement

p values <0.05 are highlighted in bold

**Supplementary Table S3: Treatments received**

|                                                    | Italy (n=127) | India (n=191)       | p value*            |
|----------------------------------------------------|---------------|---------------------|---------------------|
| <b>Glucocorticoids</b>                             |               |                     |                     |
| n(%)                                               | 124 (98)      | 148 (77)            | <0.001 <sup>b</sup> |
| on intravenous methylprednisolone                  | 7 (5)         | 2 (1)               | 0.033 <sup>b</sup>  |
| n(%)                                               |               |                     |                     |
| Starting dose (mean with SD)                       | 48.1 ± 13.3   | 33.2 ± 14.6 (n=143) | <0.001              |
| Continuing at last follow-up                       | 88 (71)       | 118 (80)            | 0.093 <sup>a</sup>  |
| n(%)                                               |               |                     |                     |
| Duration in months (mean ± SD)                     | 103 ± 90      | 38 ± 36 (n=140)     | <0.001              |
| Percentage reduction in prednisolone at last visit | 90 ± 14       | 87 ± 17 (n=119)     | 0.134               |
| <b>Methotrexate</b>                                |               |                     |                     |
| n(%)                                               | 102 (80)      | 80 (42)             | <0.001 <sup>a</sup> |
| Continuing at last follow-up                       | 77 (75)       | 40 (50%)            | <0.001 <sup>a</sup> |
| n(%)                                               |               |                     |                     |
| Duration in months (mean ± SD)                     | 57 ± 58       | 33 ± 32 (n=77)      | 0.001               |
| <b>Leflunomide</b>                                 |               |                     |                     |
| n(%)                                               | 12 (9)        | 2 (1)               | <0.001 <sup>b</sup> |
| Continuing at last follow-up                       | 11 (92)       | 1 (50%)             | 0.275 <sup>b</sup>  |
| n(%)                                               |               |                     |                     |
| Duration in months (mean ± SD)                     | 13 ± 7        | 8 ± 7 (n=2)         | 0.368               |
| <b>Azathioprine</b>                                |               |                     |                     |
| n(%)                                               | 42 (33)       | 28 (15)             | <0.001 <sup>a</sup> |
| Continuing at last follow-up                       | 11 (26)       | 9 (32)              | 0.589 <sup>a</sup>  |
| n(%)                                               |               |                     |                     |
| Duration in months (mean ± SD)                     | 55 ± 55       | 31 ± 34 (n=26)      | 0.050               |
| <b>Mycophenolate</b>                               |               |                     |                     |
| n (%)                                              | 24 (19)       | 34 (18)             | 0.804 <sup>a</sup>  |
| Continuing at last follow-up                       | 9 (38)        | 19 (56)             | 0.168 <sup>a</sup>  |
| n(%)                                               |               |                     |                     |
| Duration in months (mean ± SD)                     | 31 ± 37       | 17 ± 17 (n=34)      | 0.057               |
| <b>Cyclosporine A</b>                              |               |                     |                     |
| n(%)                                               | 3 (2)         | 0                   | 0.063 <sup>b</sup>  |

|                                                             |               |                       |                     |
|-------------------------------------------------------------|---------------|-----------------------|---------------------|
| Continuing at last follow-up<br>n(%)                        | 1 (33)        | 0                     | -                   |
| Duration in months (mean $\pm$<br>SD)                       | 26 (19)       | 0                     | -                   |
| <b>Sirolimus</b>                                            |               |                       |                     |
| n(%)                                                        | 5 (4)         | 0                     | 0.001 <sup>b</sup>  |
| Continuing at last follow-up<br>n(%)                        | 2 (40)        | 0                     | -                   |
| Duration in months (mean $\pm$<br>SD)                       | 80 (64)       | 0                     | -                   |
| <b>Tacrolimus</b>                                           |               |                       |                     |
| n(%)                                                        | 1 (0.8)       | 68 (36)               | <0.001 <sup>b</sup> |
| Continuing at last follow-up<br>n(%)                        | 0 (0)         | 54 (79)               | 0.217 <sup>b</sup>  |
| Duration in months (mean $\pm$<br>SD)                       | 22            | 18 $\pm$ 20<br>(n=68) | -                   |
| <b>Cyclophosphamide</b>                                     |               |                       |                     |
| n(%)                                                        | 0             | 4 (2)                 | 0.153               |
| Continuing at last follow-up<br>n(%)                        | 0             | 0 (0)                 | -                   |
| Duration in months (mean $\pm$<br>SD)                       | 0             | 6 $\pm$ 2 (n=4)       | -                   |
| <b>Total number of csDMARDs<br/>received</b> (mean with SD) | 1.5 $\pm$ 0.9 | 1.1 $\pm$ 0.9         | <0.001              |
| <b>Infliximab</b>                                           |               |                       |                     |
| n(%)                                                        | 58 (46)       | 0                     | <0.001 <sup>b</sup> |
| Continuing at last follow-up<br>n(%)                        | 40 (69)       | 0                     | -                   |
| Duration in months (mean $\pm$<br>SD)                       | 58 $\pm$ 51   | 0                     |                     |
| <b>Adalimumab</b>                                           |               |                       |                     |
| n(%)                                                        | 22 (17)       | 1 (0.5)               | <0.001 <sup>b</sup> |
| Continuing at last follow-up<br>n(%)                        | 12 (55)       | 1 (100%)              | 0.999 <sup>b</sup>  |
| Duration in months (mean $\pm$<br>SD)                       | 32 $\pm$ 31   | 10                    | -                   |
| <b>Golimumab</b>                                            |               |                       |                     |
| n(%)                                                        | 13 (10)       | 0                     | <0.001 <sup>b</sup> |
| Continuing at last follow-up<br>n(%)                        | 7 (54)        | 0                     | -                   |
| Duration in months (mean $\pm$<br>SD)                       | 21 $\pm$ 21   | 0                     | -                   |

|                                      |         |               |                     |
|--------------------------------------|---------|---------------|---------------------|
| <b>Certolizumab pegol</b>            |         |               |                     |
| n(%)                                 | 1 (0.8) | 0             | 0.399 <sup>b</sup>  |
| Continuing at last follow-up<br>n(%) | 0 (0)   | 0             | -                   |
| Duration in months (mean ±<br>SD)    | 5       | 0             | -                   |
| <b>Etanercept</b>                    |         |               |                     |
| n(%)                                 | 2 (2)   | 0             | 0.159 <sup>b</sup>  |
| Continuing at last follow-up<br>n(%) | 0 (0)   | 0             | -                   |
| Duration in months (mean ±<br>SD)    | 14 ± 3  | 0             | -                   |
| <b>Tocilizumab</b>                   |         |               |                     |
| n(%)                                 | 22 (17) | 4 (2)         | <0.001 <sup>b</sup> |
| Continuing at last follow-up<br>n(%) | 11 (50) | 0 (0)         | 0.113 <sup>b</sup>  |
| Duration in months (mean ±<br>SD)    | 30 ± 32 | 10 ± 11 (n=4) | 0.235               |
| <b>Abatacept</b>                     |         |               |                     |
| n(%)                                 | 1 (0.8) | 0             | 0.399 <sup>b</sup>  |
| Continuing at last follow-up<br>n(%) | 0 (0)   | 0             | -                   |
| Duration in months (mean ±<br>SD)    | 19      | 0             | -                   |
| <b>Rituximab</b>                     |         |               |                     |
| n(%)                                 | 1 (0.8) | 0             | 0.399 <sup>b</sup>  |
| Continuing at last follow-up<br>n(%) | 0 (0)   | 0             | -                   |
| Duration in months (mean ±<br>SD)    | 3       | 0             | -                   |
| <b>Anakinra</b>                      |         |               |                     |
| n(%)                                 | 3 (2)   | 0             | 0.063 <sup>b</sup>  |
| Continuing at last follow-up<br>n(%) | 1 (33)  | 0             | -                   |
| Duration in months (mean ±<br>SD)    | 11 ± 3  | 0             | -                   |
| <b>Tofacitinib</b>                   |         |               |                     |
| n(%)                                 | 3 (2)   | 1 (0.5)       | 0.306 <sup>b</sup>  |
| Continuing at last follow-up<br>n(%) | 3 (100) | 1 (100%)      | >0.999 <sup>b</sup> |
| Duration in months (mean ±<br>SD)    | 28 ± 9  | 12            | -                   |

|                                                                          |           |             |                              |
|--------------------------------------------------------------------------|-----------|-------------|------------------------------|
| <b>Baricitinib</b>                                                       |           |             |                              |
| n(%)                                                                     | 0         | 0           | -                            |
| Continuing at last follow-up<br>n(%)                                     | 0         | 0           | -                            |
| Duration in months (mean ±<br>SD)                                        | 0         | 0           | -                            |
| <b>Total number of ts or<br/>bDMARDs received</b> (mean<br>with SD)      | 1 ± 1.2   | 0.04 ± 0.21 | <b>&lt;0.001</b>             |
| <b>Antihypertensives</b>                                                 |           |             |                              |
| <b>n(%)</b>                                                              | 56 (44)   | 148 (77)    | <b>&lt;0.001<sup>a</sup></b> |
| Mean (± SD) number of<br>antihypertensives at<br>presentation            | 0.9 ± 1.2 | 1.7 ± 1.4   | <b>&lt;0.001</b>             |
| <b>Aspirin</b>                                                           | 71 (56)   | 50 (26)     | <b>&lt;0.001<sup>a</sup></b> |
| <b>Clopidogrel</b>                                                       | 9 (7)     | 21 (11)     | 0.243                        |
| <b>Statin</b>                                                            | 43 (34)   | 23 (12)     | <b>&lt;0.001<sup>a</sup></b> |
| * Chi squared <sup>a</sup> / Fisher's exact <sup>b</sup> for proportions |           |             |                              |
| SD – Standard deviation                                                  |           |             |                              |
| p values <0.05 are highlighted in bold                                   |           |             |                              |



**Supplementary Table S4: Reasons for failure of disease-modifying anti-rheumatic drugs**

| Reason for failure                            | Italy (n=95) | India (n=66) | p value*<br>corrected for<br>multiple<br>testing |
|-----------------------------------------------|--------------|--------------|--------------------------------------------------|
| Switch to another DMARD                       | 26 (27%)     | 31 (47%)     | <b>0.031</b>                                     |
| Suspension of DMARD                           | 12 (13%)     | 19 (29%)     | <b>0.031</b>                                     |
| Add-on of another DMARD                       | 57 (60%)     | 16 (24%)     | <b>&lt;0.001</b>                                 |
| DMARD – Disease-modifying anti-rheumatic drug |              |              |                                                  |
| *Chi square test                              |              |              |                                                  |
| p values <0.05 are highlighted in bold        |              |              |                                                  |

**Supplementary Table S5: Choice of first and second-line disease-modifying anti-rheumatic drugs**

|                                               | Italy (n=114)     | India (n=143)                                 |
|-----------------------------------------------|-------------------|-----------------------------------------------|
| First-line DMARD                              | n= 114            | n=143                                         |
|                                               | Methotrexate (85) | Methotrexate (64)                             |
|                                               | Azathioprine (20) | Tacrolimus (50)                               |
|                                               | Leflunomide (1)   | Azathioprine (12)                             |
|                                               | Mycophenolate (6) | Mycophenolate (12)                            |
|                                               | Infliximab (2)    | Cyclophosphamide followed by Azathioprine (2) |
|                                               |                   | Cyclophosphamide (1)                          |
|                                               |                   | Tocilizumab (1)                               |
|                                               |                   | Methotrexate + Mycophenolate (1)              |
| Second-line DMARD (switch or add-on)          | n=81              | n=50                                          |
|                                               | Infliximab (41)   | Mycophenolate (15)                            |
|                                               | Azathioprine (9)  | Azathioprine (11)                             |
|                                               | Methotrexate (8)  | Methotrexate (10)                             |
|                                               | Golimumab (6)     | Tacrolimus (8)                                |
|                                               | Adalimumab (6)    | Leflunomide (2)                               |
|                                               | Tocilizumab (5)   | Tocilizumab (2)                               |
|                                               | Leflunomide (2)   | Adalimumab (1)                                |
|                                               | Sirolimus (2)     | Cyclophosphamide (1)                          |
|                                               | Tofacitinib (1)   |                                               |
|                                               | Mycophenolate (1) |                                               |
| DMARD – Disease-modifying anti-rheumatic drug |                   |                                               |
